# Supplementary material for: The hydrate of a neutral iron(iii) complex based on the pyruvic acid thiosemicarbazone ligand with abrupt spin-crossover with T1/2 = 340 K and a wide hysteresis loop of 45 K
Source: Royal Society of Chemistry journal article supplement (doi:10.1039/d4dt02901a), 2024-11-08
Supplement: d4dt02901a1.pdf [file d4dt02901a1.pdf]

## Electronic Supplementary Information (ESI)

### Hydrate of neutral iron(III) complex based on pyruvic acid thiosemicarbazone ligand with abrupt spin-crossover with $T_{1/2}=340$ K and wide hysteresis loop of 45 K

Maxim A. Blagov,<sup>a</sup> Alexander V. Akimov,<sup>a</sup> Anatoly S. Lobach,<sup>a</sup> Leokadiya V. Zorina,<sup>b</sup> Sergey V. Simonov,<sup>b</sup> Konstantin V. Zakharov<sup>c</sup>, Alexander N. Vasiliev<sup>c</sup> and Nataliya G. Spitsyna\*<sup>a</sup>

*<sup>a</sup>Federal Research Center of Problems of Chemical Physics and Medicinal Chemistry, Russian Academy of Sciences, Chernogolovka, Moscow region 142432, Russia.*

*E-mail: spitsina@icp.ac.ru*

*<sup>b</sup>Osipyan Institute of Solid State Physics Russian Academy of Sciences, Chernogolovka, Moscow region 142432, Russia.*

*<sup>c</sup>Lomonosov Moscow State University, Moscow 119991, Russia.*

#### Author Contributions

The synthesis and characterizations of compounds, M.B., N.S., and A.L.; X-ray analysis and crystal structure description, L.Z. and S.S.; *dc* magnetic measurements, K.Z., A.V.; EPR measurements, A.A.; measured and contributed to analyses of <sup>57</sup>Fe Mössbauer spectral data and the DFT calculations, M.B.; writing the original draft, M.B., N.S.. All authors discussed the results and contributed to the final manuscript.

## Contents

| Instrumental techniques |                                                                                                                                                                                                                                                                                                                                                                      | p. S2-S4    |
|-------------------------|----------------------------------------------------------------------------------------------------------------------------------------------------------------------------------------------------------------------------------------------------------------------------------------------------------------------------------------------------------------------|-------------|
| <b>Figure S1</b>        | Photo of the crystal of $[\text{Fe}^{\text{III}}(\text{Hthpy})(\text{thpy})]\cdot\text{H}_2\text{O}$ during X-ray measurements at 150 K                                                                                                                                                                                                                              | p. S5       |
| <b>Figure S2</b>        | PXRD pattern in the $2\theta$ range from $5^\circ$ to $70^\circ$ for $[\text{Fe}^{\text{III}}(\text{Hthpy})(\text{thpy})]\cdot\text{H}_2\text{O}$ at 296 K                                                                                                                                                                                                           |             |
| <b>Figure S3</b>        | Thermogram of $[\text{Fe}^{\text{III}}(\text{Hthpy})(\text{thpy})]\cdot\text{H}_2\text{O}$ complex                                                                                                                                                                                                                                                                   | p. S6       |
| <b>Figure S4</b>        | Comparison of experimental ATR FT-IR absorption spectra of the $\text{H}_2\text{thpy}\cdot\frac{1}{3}\text{H}_2\text{O}$ ligand and $[\text{Fe}^{\text{III}}(\text{Hthpy})(\text{thpy})]\cdot\text{H}_2\text{O}$ complex                                                                                                                                             |             |
| <b>Table S1</b>         | The table of experimental IR vibrational modes for $\text{H}_2\text{thpy}\cdot\frac{1}{3}(\text{H}_2\text{O})$ ligand and $[\text{Fe}^{\text{III}}(\text{Hthpy})(\text{thpy})]\cdot\text{H}_2\text{O}$ complex                                                                                                                                                       | p. S7       |
| <b>Table S2</b>         | Selected experimental and calculated (for <b>A</b> pair in LS state) IR vibrational modes of the complex <b>1</b>                                                                                                                                                                                                                                                    | p. S8       |
| <b>Table S3</b>         | Selected bond lengths and angles in <b>1</b> at 150 and 350 K                                                                                                                                                                                                                                                                                                        | p. S9       |
| <b>Table S4</b>         | Octahedral distortion parameters in <b>1</b>                                                                                                                                                                                                                                                                                                                         |             |
| <b>Table S5</b>         | Hydrogen bond geometry in <b>1</b> at 150 K                                                                                                                                                                                                                                                                                                                          |             |
| <b>Table S6</b>         | The unit cell parameters of <b>1</b> in the temperature range of 150–350K                                                                                                                                                                                                                                                                                            | p. S10      |
| <b>Table S7</b>         | Hydrogen bond geometry in <b>1</b> at 350 K                                                                                                                                                                                                                                                                                                                          |             |
| <b>Figure S5</b>        | Temperature dependence of the $\chi T$ product for $[\text{Fe}^{\text{III}}(\text{Hthpy})(\text{thpy})]\cdot\text{H}_2\text{O}$ in the temperature range of 2-260 K                                                                                                                                                                                                  | p. S11      |
| <b>Figure S6</b>        | Comparison of Bleaney–Bowers and Curie–Weiss fitting models for $\chi T$ temperature dependence of <b>1</b> in the temperature range of 2-60 K                                                                                                                                                                                                                       |             |
| <b>Figure S7</b>        | The first order differentiation of $\gamma_{\text{HS}}$ versus T in cooling and heating mode plots for $[\text{Fe}^{\text{III}}(\text{Hthpy})(\text{thpy})]\cdot\text{H}_2\text{O}$                                                                                                                                                                                  | p. S12      |
| <b>Table S8</b>         | Mössbauer parameters for spectra of $[\text{Fe}^{\text{III}}(\text{Hthpy})(\text{thpy})]\cdot\text{H}_2\text{O}$ in temperature range of 80–363 K in heating and cooling modes                                                                                                                                                                                       |             |
| <b>Figure S8</b>        | Mössbauer spectra of $[\text{Fe}^{\text{III}}(\text{Hthpy})(\text{thpy})]\cdot\text{H}_2\text{O}$ after heating up to 373 K at temperatures 80 and 296 K                                                                                                                                                                                                             | p. S13      |
| <b>Table S9</b>         | Mössbauer parameters for spectra of $[\text{Fe}^{\text{III}}(\text{Hthpy})(\text{thpy})]\cdot\text{H}_2\text{O}$ after heating up to 373 K at temperatures 80 and 296 K                                                                                                                                                                                              |             |
| <b>Table S10</b>        | Comparison of bond lengths of the Fe(III) coordination octahedron of crystal structure <b>1</b> at 150 K and optimized structural fragments pair <b>A</b> , <b>B</b> in the LS ( $S=1/2$ ) state, as well as the isolated $[\text{Fe}^{\text{III}}(\text{Hthpy})(\text{thpy})]$ molecule                                                                             | p. S14      |
| <b>Table S11</b>        | Comparison of bond lengths of the Fe(III) coordination octahedron in the HS and LS states for optimized structural fragments pair <b>A</b> , <b>B</b> , and the isolated $[\text{Fe}^{\text{III}}(\text{Hthpy})(\text{thpy})]$ molecule                                                                                                                              |             |
| <b>Table S12</b>        | Comparison of the Fe···Fe distance in the HS and LS states for the crystal structure <b>1</b> at 150 K and optimized structural fragments pair <b>A</b> , <b>B</b> , as well as the isolated $[\text{Fe}^{\text{III}}(\text{Hthpy})(\text{thpy})]$ molecule                                                                                                          | p. S14      |
| <b>Table S13</b>        | Electronic energy, zero-point vibration energy, total energy, and total spin angular momentum of the optimized molecular geometry, X-ray geometry with optimized hydrogen atoms, and X-ray geometry calculated and experimental values of exchange coupling constant $J$ for two $[\text{Fe}^{\text{III}}(\text{Hthpy})(\text{thpy})]$ complexes in TS and BS states |             |
| <b>Table S14–S22</b>    | Cartesian coordinates of optimized structures                                                                                                                                                                                                                                                                                                                        | pp. S15–S30 |

## Instrumental techniques

**Elemental analysis and Electron-probe X-ray microanalysis.** The purity of the complexes and their solvation state was verified by determining the carbon, hydrogen, nitrogen, and sulfur content at the Vario Micro Cube (Elementar) CHNOS elemental analyzer.

EPMA was performed with a Zeiss Supra-25 analytical field emission electron microscope equipped with a Gemini electron optical column at magnification varying from 600 to 6200 depending on the sample and the electron beam energy of 9.7-20 keV. The depth of beam penetration into the sample was 1-3  $\mu\text{m}$ .

**Thermogravimetric Analysis.** The TGA was performed using a NETZSCH STA 449F3 thermal analyzer. Approximately 14.07 mg of sample were placed into an  $\text{Al}_2\text{O}_3$  crucible with a prehole on the lid and then heated from 25 to 400  $^\circ\text{C}$ . The thermogravimetric analysis was performed in a high-purity argon atmosphere with a gas flow rate of 12  $\text{ml}\cdot\text{min}^{-1}$ , at the heating rate of 10  $^\circ\text{C}\cdot\text{min}^{-1}$ .

**FT-IR Spectroscopy.** Infrared spectra were recorded at room temperature in the range of 4000–50  $\text{cm}^{-1}$  (50 averaged scans, the apparent resolution is 4  $\text{cm}^{-1}$ ) on a FT-IR Bruker Vertex 70V spectrometer in the attenuated total reflectance (ATR) mode with a Platinum-ATR (Bruker) accessory equipped with a pure diamond crystal (diamond ATR polarization accessory with 1 reflection top-plate and pressure arm).

**Powder X-ray diffraction.** PXRD was measured using a Rigaku SmartLab SE powder diffractometer with a 1D strip detector at room temperature ( $\text{CuK}_\alpha$  radiation, step = 0.02 $^\circ$ , single crystal cuvette). The PXRD pattern is used as a fingerprint for identifying the crystalline phase presented in a material.

**Single crystal X-ray diffraction.** Crystal data for **1**:  $\text{C}_8\text{H}_{13}\text{FeN}_6\text{O}_5\text{S}_2$ , F.w. 393.21, black prism, 0.25 $\times$ 0.35 $\times$ 0.53  $\text{mm}^3$ , monoclinic,  $P2_1/n$ .  $T = 150(1)$  K:  $a = 11.1829(3)$ ,  $b = 10.4546(3)$ ,  $c = 12.7936(3)$   $\text{\AA}$ ,  $\beta = 102.816(3)$ ,  $V = 1458.47(7)$   $\text{\AA}^3$ ,  $Z = 4$ ,  $d_{\text{calcd}} = 1.791$   $\text{g}/\text{cm}^3$ ,  $\mu = 13.53$   $\text{cm}^{-1}$ ,  $2\theta_{\text{max}} = 66.2^\circ$ ; 33763 reflections collected, 5244 independent,  $R_{\text{int}} = 0.0233$ ;  $R_1 = 0.0256$  for 4680 observed data [ $I > 2\sigma(I)$ ] with 11 restraints and 220 parameters;  $wR_2 = 0.0636$  (all data); final G.o.F. = 1.002.  $T = 350(1)$  K:  $a = 11.2865(2)$ ,  $b = 10.4627(2)$ ,  $c = 12.9417(2)$   $\text{\AA}$ ,  $\beta = 102.964(2)$ ,  $V = 1489.30(5)$   $\text{\AA}^3$ ,  $Z = 4$ ,  $d_{\text{calcd}} = 1.754$   $\text{g}/\text{cm}^3$ ,  $\mu = 13.25$   $\text{cm}^{-1}$ ,  $2\theta_{\text{max}} = 66.0^\circ$ ; 34128 reflections collected, 5271 independent,  $R_{\text{int}} = 0.0245$ ;  $R_1 = 0.0341$  for 4229 observed data [ $I > 2\sigma(I)$ ] with 11 restraints and 220 parameters;  $wR_2 = 0.0848$  (all data); final G.o.F. = 1.003.

X-ray single crystal diffraction data were collected at 150 and 350 K on an Oxford Diffraction Gemini-R CCD diffractometer equipped with an Oxford cryostream cooler [ $\lambda(\text{MoK}_\alpha) = 0.71073$   $\text{\AA}$ , graphite monochromator,  $\omega$ -scans]. Data reduction with empirical absorption correction of experimental intensities (Scale3AbsPack program) was made with the CrysAlisPro software.<sup>1</sup>

The structures were solved by a direct method and refined on  $F^2$  by a full-matrix least squares method using SHELX-2016 program package.<sup>2</sup> All non-hydrogen atoms were refined anisotropically. The positions of H atoms in water molecules were found from the

difference Fourier map. All N-H and O-H bond lengths were refined with additional restraints (SADI). Deposition numbers CCDC 2389231 (150 K) and 2389232 (350 K) contain the supplementary crystallographic data for this paper. These data are provided free of charge by the joint Cambridge Crystallographic Data Centre and Fachinformationszentrum Karlsruhe Access Structures service [www.ccdc.cam.ac.uk/structures](http://www.ccdc.cam.ac.uk/structures).

**Magnetic Measurements and X-band EPR spectroscopy.** The magnetic properties of complex  $[\text{Fe}^{\text{III}}(\text{Hthpy})(\text{thpy})]\cdot\text{H}_2\text{O}$  (**1**) were investigated using the VSM option of the “Quantum Design” Physical Properties Measurements System PPMS–9T on the fine powder sample with a mass of about 10 mg placed into the plastic capsule. The temperature dependence of the direct current (*dc*) magnetic susceptibility ( $\chi$ ) of the title compound has been taken at warming and cooling modes (temperature range of 2 – 363 K) in a magnetic field  $B = 0.1$  T at the temperature change rate 2 K/min. Magnetic moment of the samples was corrected considering sample holder contribution. Magnetic susceptibility of **1** complex was corrected for diamagnetic contribution of Pascal constants.

Continuous-wave EPR spectra were measured at X-band (9.446778 GHz) using a Bruker ELEXSYS II E500 spectrometer. Powder sample of **1** was placed in a 3 mm diameter quartz tube and filled with argon gas. Continuous flow cryostat refrigerated with liquid nitrogen was used for cooling and heating in the temperature range 100 – 368 K, with a temperature change rate of approximately 5 K/min during both heating and cooling cycles, and a 5-minute pause at each temperature to record the spectrum. The microwave power (0.6325 mW) and modulation amplitude (1 G at 100 kHz) were low enough to avoid saturation effects and line broadening.

**$^{57}\text{Fe}$  Mössbauer spectroscopy.**  $^{57}\text{Fe}$  Mössbauer absorption spectra of **1** complex were recorded on WissEl (Germany) spectrometer operating in a constant acceleration mode.  $^{57}\text{Co}$  in the Rh matrix was used as the source of  $\gamma$ -quants. Spectra at low temperatures were measured using a continuous flow helium cryostat CF-506 (Oxford Instruments) with a controllable temperature. In the temperature range of 300–365 K, the Mössbauer resistive furnace MRF-750 K was utilized. Isomer shift values were taken with respect to  $\alpha$ -Fe. The  $\gamma$ -quantum source and the standard absorber were at room temperature. Least-squares-fitted parameters are given with their standard deviation of statistical origin (in parentheses). The spectra were fit in an assumption of different widths and equal intensities of doublet resonance lines. The polycrystalline absorber **1** contained 50 mg of material per  $\text{cm}^2$  ( $\sim 0.31$  mg  $\text{cm}^2$  of  $^{57}\text{Fe}$ ).

**Computational details.** All density functional theory (DFT) calculations were carried out using the Gaussian 09 (Revision B.01) computational package<sup>3</sup> on the servers and workstations of the FRC PCP MC RAS, Chernogolovka. Calculations of the neutral complex  $[\text{Fe}^{\text{III}}(\text{Hthpy})(\text{thpy})]$  were performed with an unrestricted wave function. Geometry optimizations were done without any symmetry constraints. The X-ray structure of neutral complex  $[\text{Fe}^{\text{III}}(\text{Hthpy})(\text{thpy})]\cdot\text{H}_2\text{O}$  at 150 K was used as the starting structure for structural optimization. For the  $[\text{Fe}^{\text{III}}(\text{Hthpy})(\text{thpy})]$  complexes, the

molecular geometries and harmonic vibrational frequencies were calculated using the 6-311+G(d,p) basis set. Final electronic energies ( $E_{el}$ ) for the DFT functionals were obtained by means of single point calculations (SP) using the 6-311+G(2df,2p) basis set. The total electronic energies  $E_0$  ( $E_0 = E_{el} + E_{ZPV}$ ) were calculated by combining the electronic energies computed by means of SP calculations with the zero point vibration energies ( $E_{ZPV}$ ) evaluated at the geometry optimization level of theory. The TPSSH<sup>4</sup> functional was employed in this study. The exchange interaction parameter was evaluated within the broken symmetry approximation by Ginsberg, Noodleman, Yamaguchi, and others.<sup>5-7</sup>

#### Reference to the instrumental techniques:

1. *CrysAlisPro, Version 1.171.38*, Rigaku Oxford Diffraction, 2015.
2. G. M. Sheldrick, *Acta Cryst., Sect. A*, 2008, **64**, 112.
3. M. J. Frisch, G. W. Trucks, H. B. Schlegel, G. E. Scuseria, M. A. Robb, J. R. Cheeseman, G. Scalmani, V. Barone, B. Mennucci, G. A. Petersson, H. Nakatsuji, M. Caricato, X. Li, H. P. Hratchian, A. F. Izmaylov, J. Bloino, G. Zheng, J. L. Sonnenberg, M. Hada, M. Ehara, K. Toyota, R. Fukuda, J. Hasegawa, M. Ishida, T. Nakajima, Y. Honda, O. Kitao, H. Nakai, T. Vreven, J. A. Montgomery Jr., J. E. Peralta, F. Ogliaro, M. Bearpark, J. J. Heyd, E. Brothers, K. N. Kudin, V. N. Staroverov, T. Keith, R. Kobayashi, J. Normand, K. Raghavachari, A. Rendell, J. C. Burant, S. S. Iyengar, J. Tomasi, M. Cossi, N. Rega, J. M. Millam, M. Klene, J. E. Knox, J. B. Cross, V. Bakken, C. Adamo, J. Jaramillo, R. Gomperts, R. E. Stratmann, O. Yazyev, A. J. Austin, R. Cammi, C. Pomelli, J. W. Ochterski, R. L. Martin, K. Morokuma, V. G. Zakrzewski, G. A. Voth, P. Salvador, J. J. Dannenberg, S. Dapprich, A. D. Daniels, O. Farkas, J. B. Foresman, J. V. Ortiz, J. Cioslowski and D. J. Fox, *Gaussian 09, Revision B.01*, Gaussian, Inc., Wallingford CT, 2010.
4. V. N. Staroverov, G. E. Scuseria, J. Tao and J. P. Perdew, *J. Chem. Phys.*, 2003, **119**, 12129.
5. A. P. Ginsberg, *J. Am. Chem. Soc.*, 1980, **102**, 111.
6. L. Noodleman, C. Y. Peng, D. A. Case and J. M. Mouesca, *Coord. Chem. Rev.*, 1995, **144**, 199.
7. Yamaguchi, Y. Takahara and T. Fueno, in *Applied Quantum Chemistry*, ed. J. V. H. Smith, H. F. Schaefer and K. Morokuma, Reidel, 1986, pp. 155–184.

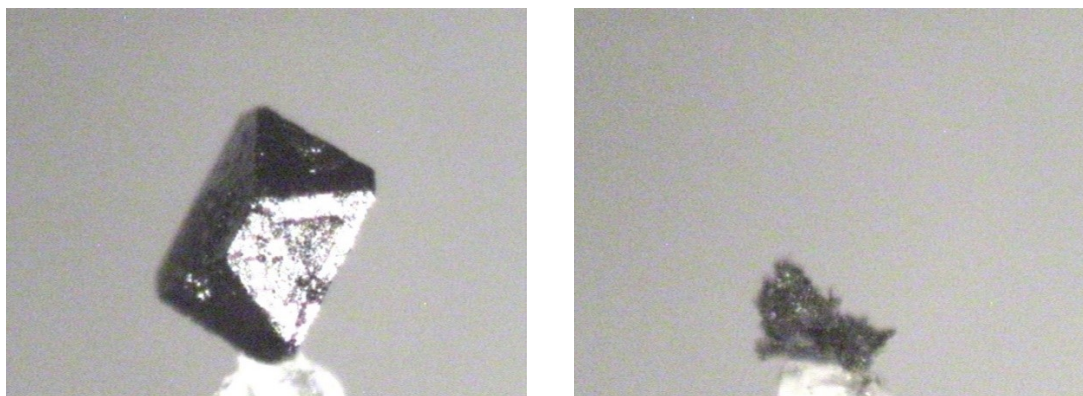

**Figure S1.** Photo of the crystal of  $[\text{Fe}^{\text{III}}(\text{Hthpy})(\text{thpy})]\cdot\text{H}_2\text{O}$  (**1**) during X-ray measurements in heating at 150 K (left) and at 364 K (right).

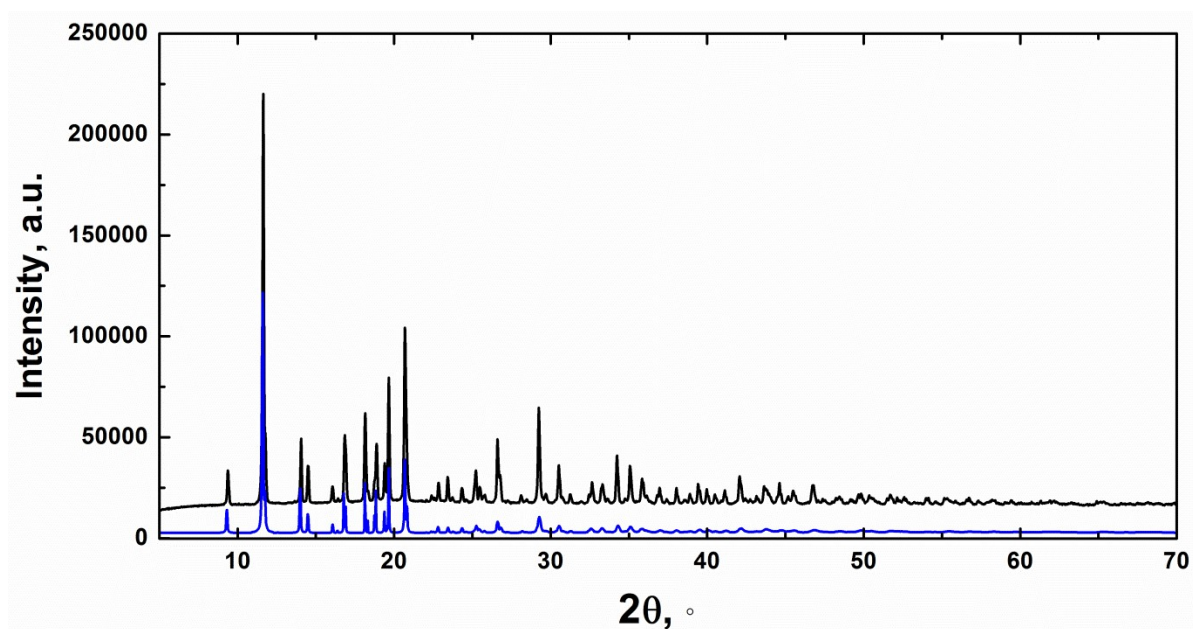

**Figure S2.** PXRD pattern in the  $2\theta$  range from  $5^\circ$  to  $70^\circ$  for  $[\text{Fe}^{\text{III}}(\text{Hthpy})(\text{thpy})]\cdot\text{H}_2\text{O}$  at 296 K (black line) with simulations based on 150 K single crystal structure (blue line).

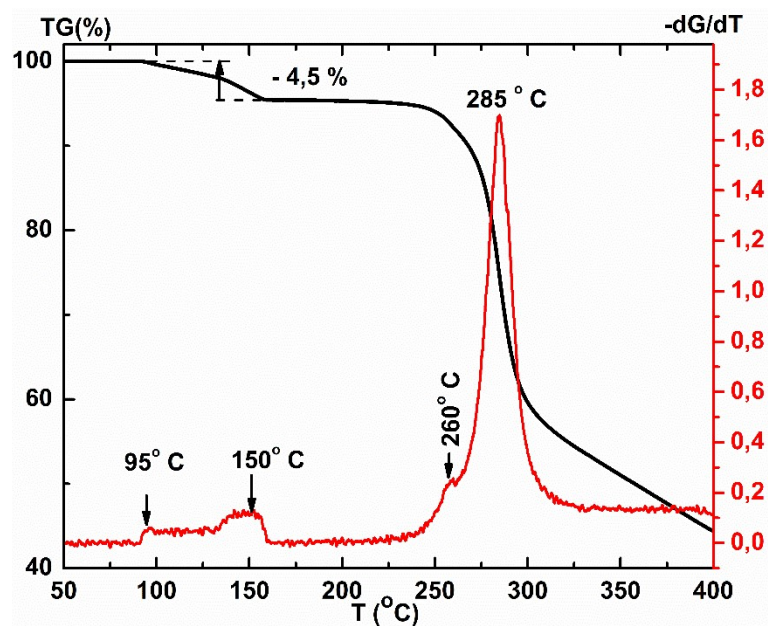

**Figure S3.** Thermogram (TG) of  $[\text{Fe}^{\text{III}}(\text{Hthpy})(\text{thpy})]\cdot\text{H}_2\text{O}$  (normal curve (black) and 1<sup>st</sup> derivative of TG (red).

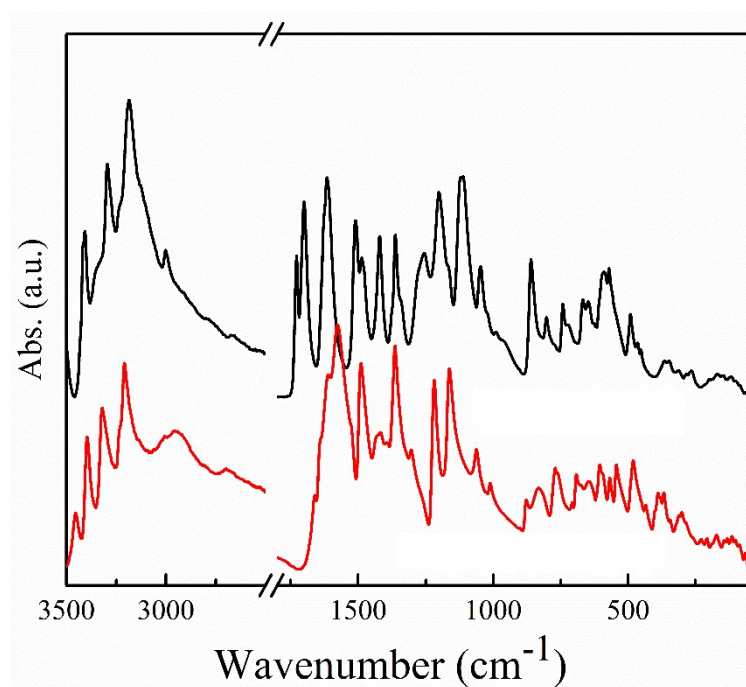

**Figure S4.** Experimental ATR FT-IR absorption spectra for the sample of the  $\text{H}_2\text{thpy}\cdot\frac{1}{3}\text{H}_2\text{O}$  ligand (black line) and  $[\text{Fe}^{\text{III}}(\text{Hthpy})(\text{thpy})]\cdot\text{H}_2\text{O}$  neutral complex (red line).

**Table S1.** The table of experimental IR vibrational modes for  $\text{H}_2\text{thpy}\cdot\frac{1}{3}(\text{H}_2\text{O})$  ligand and  $[\text{Fe}^{\text{III}}(\text{Hthpy})(\text{thpy})]\cdot\text{H}_2\text{O}$  (**1**) neutral complex. Selected calculated (for **A** pair in LS state) IR vibrational modes of the **1** are showed in brackets.

| Assignment of most essential vibrational mode   | $\nu$ , $\text{cm}^{-1}$                                  |                                                                              |
|-------------------------------------------------|-----------------------------------------------------------|------------------------------------------------------------------------------|
|                                                 | $\text{H}_2\text{thpy}\cdot\frac{1}{3}\text{H}_2\text{O}$ | $[\text{Fe}^{\text{III}}(\text{Hthpy})(\text{thpy})]\cdot\text{H}_2\text{O}$ |
| $\nu(\text{C-OH}), \nu(\text{NH}_2)$            | 3501(m)                                                   |                                                                              |
| $\nu(\text{NH}_2)$                              | 3407(s)                                                   | 3453(m)/(3469)<br>3396(s)                                                    |
| $\nu(\text{NH})$                                | 3294(s)                                                   | 3319(s)                                                                      |
| $\nu(\text{OH})$                                | 3226(sh)<br>3186(s)                                       | 3228(sh)<br>3208(s)                                                          |
| $\nu(\text{CH}_3)$                              | 3001                                                      | 2950(m)/(3001)                                                               |
| $\nu(\text{C=O})$                               | 1728(m)<br>1701(s)                                        | 1661(w)                                                                      |
| $\delta(\text{NH})$<br>$\delta(\text{NH}_2)$    | 1616(s)                                                   | 1610(w)<br>1577(s)/(1575)                                                    |
| $\nu(\text{C=N})$                               | 1511(s)                                                   |                                                                              |
| $\delta(\text{CH}_3)$                           | 1485(m)                                                   | 1489(s)/(1482)                                                               |
| $\nu(\text{NCS})$                               | 1420(s)                                                   | 1418(w)                                                                      |
| $\delta(\text{NH}_2)$<br>$\delta(\text{NH})$    | 1362(m)                                                   | 1364(s)/(1364)<br>1303(w)/(1305)                                             |
| $\nu(\text{C=S})$                               | 1256(m)                                                   |                                                                              |
| $\delta(\text{NCS})$<br>$\nu(\text{C-C(=O)-O})$ | 1200(s)<br>1168(sh)<br>1115(s)<br>1047(m)                 | 1217(s)<br>1163(s)<br>1063(w)                                                |
| $\nu(\text{N-N})$                               | 860(s)                                                    | 877(w)                                                                       |
| $\delta(\text{CH}_3)$<br>$\nu(\text{C-C})$      | 802(m)                                                    | 770(m)/(764)<br>762(m)                                                       |
| $\delta(\text{NH})$                             | 742(m)<br>722(m)<br>671(w)<br>647(w)                      | 692(w)<br>645(m)                                                             |
| $\nu(\text{COO-H})$                             | 590(m)                                                    |                                                                              |
| $\nu(\text{Fe-O})$                              |                                                           | 568(w)                                                                       |
| $\nu(\text{Fe-N}), \nu(\text{Fe-S})$            |                                                           | 543(m)/(548)                                                                 |

(w): weak, (m): middle, (s): strong, (sh): shoulder.



**Table S2.** Selected experimental and calculated (in brackets for pair A in LS state) IR vibrational modes of the complex **1** (TPSSh/6-311+G(d,p)).

|                                                                                     |                                                                                      |
|-------------------------------------------------------------------------------------|--------------------------------------------------------------------------------------|
| 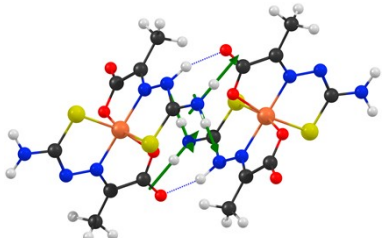   |    |
| 3453 (3469)                                                                         | 1364 (1364)                                                                          |
|    |    |
| 3009 (3001)                                                                         | 1300 (1305)                                                                          |
|   |   |
| 1577 (1575)                                                                         | 770 (764)                                                                            |
|  |  |
| 1489 (1482)                                                                         | 543 (548)                                                                            |

\*Blue– nitrogen (N); yellow– sulfur (S); red- oxygen (O); black- carbon (C); white- hydrogen (H); orange- iron (Fe).

**Table S3.** Selected bond lengths (Å) and angles (°) in **1** at 150 and 350 K.

| Bond                     | Bond length (Å) |            | Angle           | Angle value (°) |           |
|--------------------------|-----------------|------------|-----------------|-----------------|-----------|
|                          | 150 K           | 350 K      |                 | 150 K           | 350 K     |
| Fe(1)-N(1)*              | 1.9096(9)       | 1.9205(12) | O(1)-Fe(1)-S(1) | 168.40(3)       | 167.74(4) |
| Fe(1)-N(3)**             | 1.9152(9)       | 1.9246(12) | O(2)-Fe(1)-S(2) | 168.32(3)       | 167.63(4) |
| Fe(1)-O(1)*              | 1.9318(8)       | 1.9328(12) | N(1)-Fe(1)-N(3) | 173.55(4)       | 173.24(5) |
| Fe(1)-O(2)**             | 1.9608(9)       | 1.9629(12) | O(1)-Fe(1)-O(2) | 86.80(4)        | 86.96(6)  |
| Fe(1)-S(1)*              | 2.2262(3)       | 2.2288(5)  | O(1)-Fe(1)-N(1) | 83.42(4)        | 83.07(5)  |
| Fe(1)-S(2)**             | 2.2354(3)       | 2.2480(5)  | O(1)-Fe(1)-N(3) | 90.40(4)        | 90.26(5)  |
| N(2)-C(1)* <sup>d</sup>  | 1.334(1)        | 1.331(2)   | O(1)-Fe(1)-S(2) | 90.59(3)        | 90.75(4)  |
| N(4)-C(4)** <sup>s</sup> | 1.355(1)        | 1.349(2)   | O(2)-Fe(1)-N(1) | 95.77(4)        | 96.72(5)  |
| S(1)-C(1)* <sup>s</sup>  | 1.752(1)        | 1.752(2)   | O(2)-Fe(1)-N(3) | 81.98(4)        | 81.78(5)  |
| S(2)-C(4)** <sup>d</sup> | 1.721(1)        | 1.717(2)   | O(2)-Fe(1)-S(1) | 90.65(3)        | 90.57(4)  |
|                          |                 |            | N(1)-Fe(1)-S(1) | 85.59(3)        | 85.31(4)  |
|                          |                 |            | N(1)-Fe(1)-S(2) | 95.24(3)        | 95.07(4)  |
|                          |                 |            | N(3)-Fe(1)-S(1) | 100.45(3)       | 101.27(4) |
|                          |                 |            | N(3)-Fe(1)-S(2) | 86.66(3)        | 86.08(4)  |
|                          |                 |            | S(1)-Fe(1)-S(2) | 94.083(13)      | 94.13(2)  |

(\*) Bonds in (thpy)<sup>2-</sup> moiety, (\*\*) bonds in (Hthpy)<sup>-</sup> moiety; (<sup>s</sup>) and (<sup>d</sup>) – single and double bonds, respectively.

**Table S4.** Octahedral distortion parameters in **1**.\*

| Octahedron, temperature                               | $\Sigma$ , ° | $\Theta$ , ° | $\langle \text{Fe-O/N/S} \rangle$ , Å | $\zeta$ , Å | $\Delta$ , Å |
|-------------------------------------------------------|--------------|--------------|---------------------------------------|-------------|--------------|
| FeN <sub>2</sub> O <sub>2</sub> S <sub>2</sub> , 150K | 52.7515      | 181.2127     | 2.0298                                | 0.803789    | 0.004966     |
| FeN <sub>2</sub> O <sub>2</sub> S <sub>2</sub> , 350K | 55.5750      | 192.4462     | 2.0362                                | 0.808277    | 0.004976     |

\* $\Sigma$  is the sum of the deviation from 90° of the 12 *cis*-angles of the FeN<sub>2</sub>O<sub>2</sub>S<sub>2</sub> octahedron.

$\Theta$  is the sum of the deviation from 60° of the 24 trigonal angles of the projection of the FeN<sub>2</sub>O<sub>2</sub>S<sub>2</sub> octahedron onto the trigonal faces.  $\zeta$  is the distance distortion parameter, which is the sum of deviation from individual M-X bond distances with respect to the mean metal-ligand bond distance.  $\Delta$  is the scatter in metal-ligand bond lengths defined as normalized mean-square error.<sup>1</sup>

**Reference:** 1. R. Ketkaew, Y. Tantirungrotechai, P. Harding, G. Chastanet, P. Guionneau, M. Marchivie and D. J. Harding, *OctaDist*: a tool for calculating distortion parameters in spin crossover and coordination complexes, *Dalton Trans.* 2021, **50(3)**, 1086–1096.

**Table S5.** Hydrogen bond geometry in **1** at 150 K.

| Donor--H..Acceptor | [Symmetry of A]      | D-H, Å  | H...A, Å | D...A, Å | D-H...A, ° |
|--------------------|----------------------|---------|----------|----------|------------|
| N4 --H4 ..O3       | [-x,1-y,-z]          | 0.80(1) | 2.07(1)  | 2.744(1) | 142(2)     |
| N5 --H5a ..O2      | [-x,1-y,1-z]         | 0.83(1) | 2.35(1)  | 3.099(1) | 149(2)     |
| N5 --H5b ..O4      | [x+0.5,0.5-y,z+0.5]  | 0.84(1) | 2.08(1)  | 2.908(1) | 169(2)     |
| N6 --H6a ..O5w     | [0.5-x, y-0.5,0.5-z] | 0.83(1) | 1.97(1)  | 2.788(1) | 166(2)     |
| N6 --H6b ..O5w     | [x+0.5,1.5-y,z-0.5]  | 0.84(1) | 2.12(1)  | 2.847(1) | 145(2)     |
| O5w --H5w1 ..N2    | [x,y,z]              | 0.77(1) | 2.14(2)  | 2.900(1) | 169(2)     |
| O5w --H5w2 ..O4    | [-x,1-y,1-z]         | 0.76(1) | 2.13(2)  | 2.850(1) | 158(2)     |

**Table S6.** The unit cell parameters of **1** in the temperature range of 150–350 K.

| T, K | <i>a</i> , Å | <i>b</i> , Å | <i>c</i> , Å | $\beta$ , ° | <i>V</i> , Å <sup>3</sup> |
|------|--------------|--------------|--------------|-------------|---------------------------|
| 150  | 11.1829(4)   | 10.4546(3)   | 12.7936(3)   | 102.816(3)  | 1458.47(8)                |
| 200  | 11.2079(2)   | 10.4490(2)   | 12.8107(2)   | 102.838(2)  | 1462.78(4)                |
| 250  | 11.2345(2)   | 10.4452(2)   | 12.8408(2)   | 102.874(2)  | 1468.95(4)                |
| 300  | 11.2600(3)   | 10.4459(2)   | 12.8763(3)   | 102.895(2)  | 1476.31(6)                |
| 350  | 11.2783(3)   | 10.4572(2)   | 12.9331(2)   | 102.933(2)  | 1486.62(5)                |

**Table S7.** Hydrogen bond geometry in **1** at 350 K.

| Donor--H...Acceptor | [Symmetry of A]      | D-H, Å  | H...A, Å | D...A, Å | D-H...A, ° |
|---------------------|----------------------|---------|----------|----------|------------|
| N4 --H4 ..O3        | [-x,1-y,-z]          | 0.78(2) | 2.10(2)  | 2.770(2) | 144(2)     |
| N5 --H5a ..O2       | [-x,1-y,1-z]         | 0.81(2) | 2.46(2)  | 3.191(2) | 151(2)     |
| N5 --H5b ..O4       | [x+0.5,0.5-y,z+0.5]  | 0.81(2) | 2.15(2)  | 2.944(2) | 167(2)     |
| N6 --H6a ..O5w      | [0.5-x, y-0.5,0.5-z] | 0.82(2) | 2.02(2)  | 2.825(2) | 165(2)     |
| N6 --H6b ..O5w      | [x+0.5,1.5-y,z-0.5]  | 0.82(2) | 2.21(2)  | 2.894(2) | 142(2)     |
| O5w --H5w1 ..N2     | [x,y,z]              | 0.80(2) | 2.18(2)  | 2.956(2) | 164(3)     |
| O5w --H5w2 ..O4     | [-x,1-y,1-z]         | 0.79(2) | 2.17(2)  | 2.902(2) | 153(3)     |

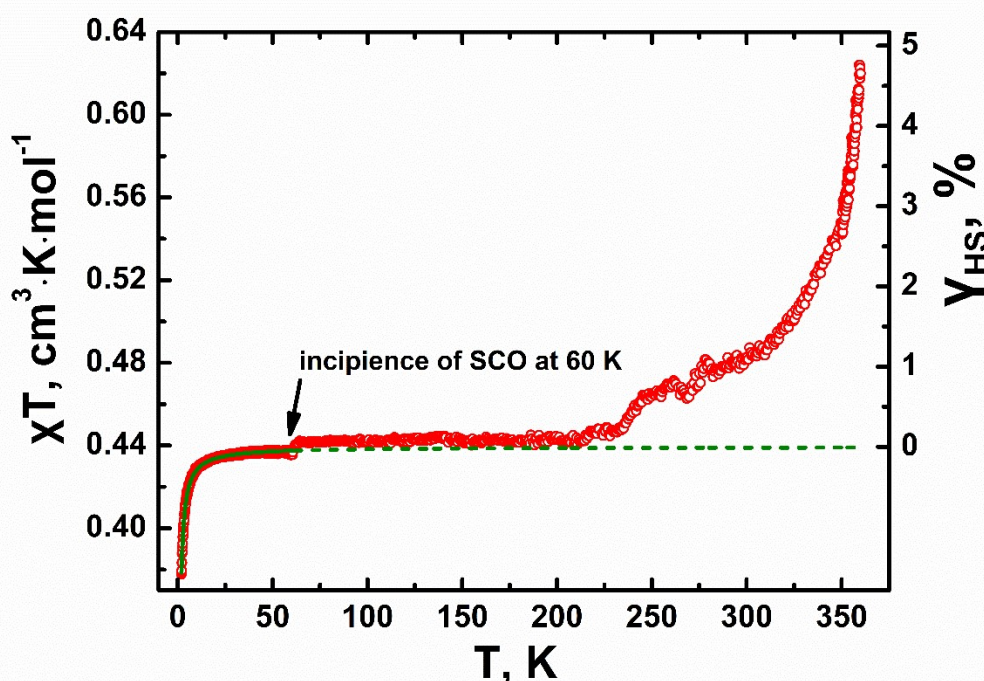**Figure S5.** Temperature dependence of the  $\chi T$  product for  $[\text{Fe}^{\text{III}}(\text{Hthpy})(\text{thpy})]\cdot\text{H}_2\text{O}$  (**1**) in the heating (red circles) mode in the temperature range of 2–360 K. The green solid line is the fit of experimental data in the heating mode (2–60 K) according to eqn (1). The parameters of the fitted curve:  $g=2.165(1)$ ;  $J/k_{\text{B}}=-0.498(1)$  K,  $R^2=0.996$ .

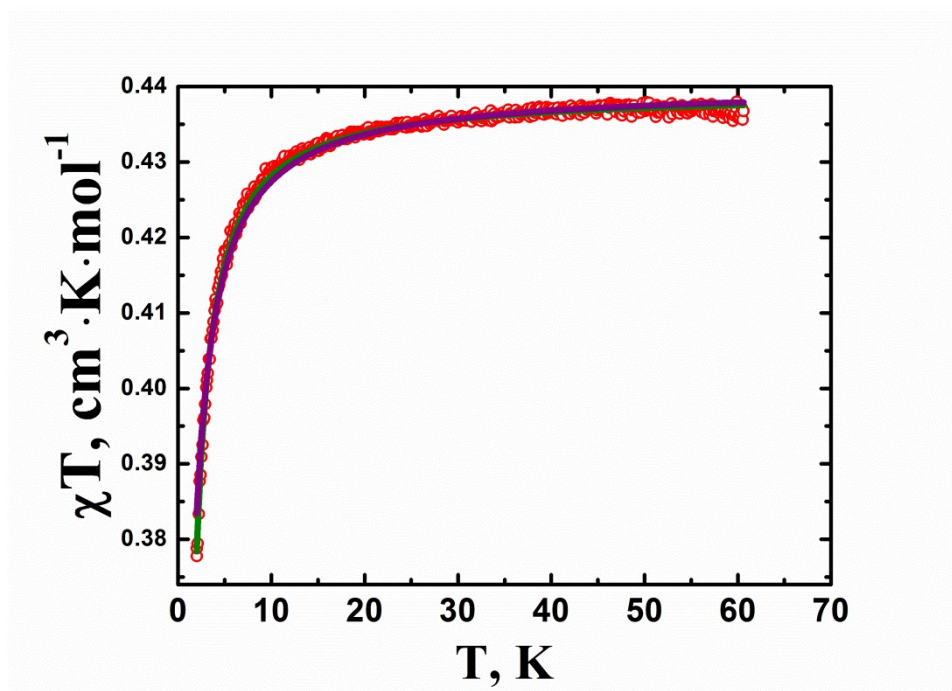

**Figure S6.** Comparison of Bleaney–Bowers (green line) and Curie–Weiss (purple line) fitting models for  $\chi T$  temperature dependence of  $[\text{Fe}^{\text{III}}(\text{Hthpy})(\text{thpy})]\cdot\text{H}_2\text{O}$  (**1**) in the heating (red circles) mode in the temperature range of 2–60 K. The parameters of the fitted curve according to Curie–Weiss law:  $g_{\text{LS}}=2.166(1)$ ;  $\theta=-0.296(1)$  K,  $R^2=0.989$ .

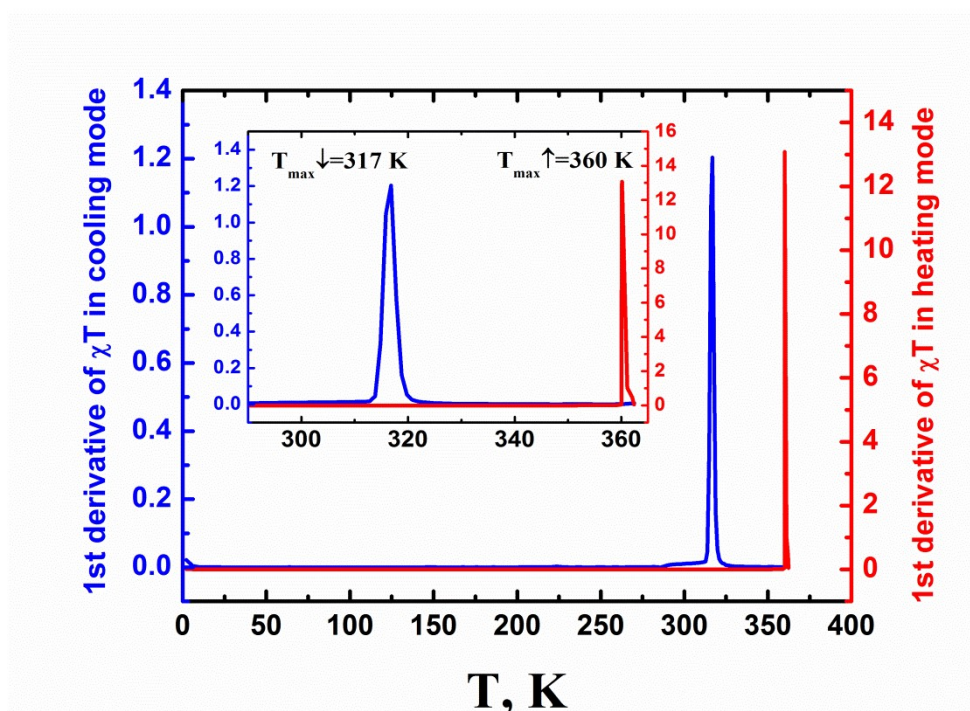

**Figure S7.** The first order differentiation of  $\gamma_{\text{HS}}$  versus  $T$  in cooling (blue line) and heating (red line) mode plots for  $[\text{Fe}^{\text{III}}(\text{Hthpy})(\text{thpy})]\cdot\text{H}_2\text{O}$ .



**Table S8.** Mössbauer parameters for spectra of  $[\text{Fe}^{\text{III}}(\text{Hthpy})(\text{thpy})]\cdot\text{H}_2\text{O}$  in temperature range of 80–365 K in heating and cooling modes.

| Temp., K     | Spin state | Parameters          |                 |                 |          |                          |
|--------------|------------|---------------------|-----------------|-----------------|----------|--------------------------|
|              |            | $\Delta E_Q$ , mm/s | $\delta$ , mm/s | $\Gamma$ , mm/s |          | $\gamma_{\text{HS}}$ , % |
|              |            |                     |                 | —               | +        |                          |
| Heating mode |            |                     |                 |                 |          |                          |
| 80           | LS         | 3.130(1)            | 0.205(1)        | 0.328(2)        | 0.267(1) | 0                        |
| 296          | LS         | 3.073(2)            | 0.127(1)        | 0.326(5)        | 0.270(4) |                          |
| 358          | LS         | 2.988(2)            | 0.105(1)        | 0.342(5)        | 0.281(4) |                          |
| 361          | LS         | 2.958(3)            | 0.106(2)        | 0.361(7)        | 0.302(6) |                          |
| 363          | HS         | 0.95(1)             | 0.346(7)        | 0.57(2)         | 0.83(5)  | 68                       |
|              | LS         | 2.954(6)            | 0.108(3)        | 0.40(1)         | 0.29(1)  |                          |
| 365          | HS         | 0.95(1)             | 0.327(7)        | 0.54(2)         | 0.94(4)  | 100                      |
| Cooling mode |            |                     |                 |                 |          |                          |
| 353          | HS         | 0.94(1)             | 0.350(8)        | 0.52(2)         | 0.82(5)  | 100                      |
| 343          | HS         | 0.95(1)             | 0.369(8)        | 0.59(2)         | 0.84(4)  |                          |
| 333          | HS         | 0.945(8)            | 0.367(6)        | 0.58(2)         | 0.84(3)  |                          |
| 328          | HS         | 0.93(1)             | 0.348(8)        | 0.61(2)         | 0.76(6)  | 76                       |
|              | LS         | 3.05(1)             | 0.119(7)        | 0.37(4)         | 0.35(3)  |                          |
| 323          | HS         | 0.81(3)             | 0.36(2)         | 0.54(4)         | 0.70(1)  | 15                       |
|              | LS         | 3.068(2)            | 0.119(1)        | 0.370(4)        | 0.305(3) |                          |
| 296          | LS         | 3.060(2)            | 0.129(1)        | 0.362(5)        | 0.295(4) | 0                        |
| 80           | LS         | 3.170(2)            | 0.207(1)        | 0.354(4)        | 0.306(3) |                          |

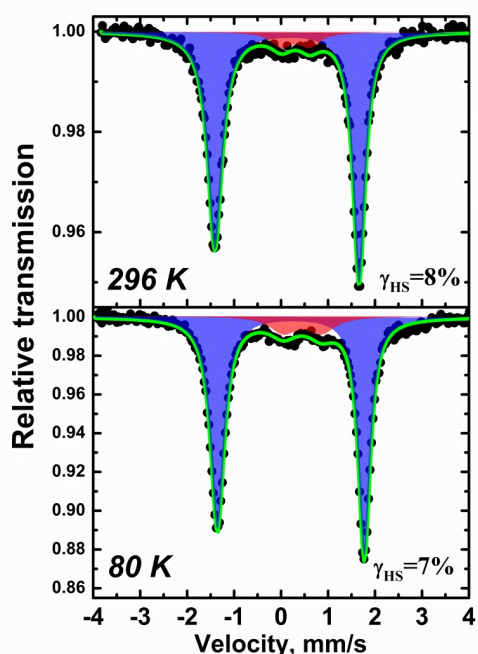

**Figure S8.** Mössbauer spectra of  $[\text{Fe}^{\text{III}}(\text{Hthpy})(\text{thpy})]\cdot\text{H}_2\text{O}$  after heating up to 373 K at temperatures 80 and 296 K. An area of doublet highlighted in red corresponds to HS ( $S=5/2$ ) Fe(III), whereas area of doublet highlighted in blue corresponds to the LS state. Green line denotes fit line.

**Table S9.** Mössbauer parameters for spectra of  $[\text{Fe}^{\text{III}}(\text{Hthpy})(\text{thpy})]\cdot\text{H}_2\text{O}$  after heating up to 373 K at temperatures 80 and 296 K.

| Temp., K | $\Delta E_{\text{Q}}$ , mm/s |          | $\delta$ , mm/s |          | $\gamma_{\text{HS}}$ , % |
|----------|------------------------------|----------|-----------------|----------|--------------------------|
|          | HS                           | LS       | HS              | LS       |                          |
| 296      | 0.60(2)                      | 3.069(2) | 0.31(2)         | 0.127(1) | 8                        |
| 80       | 0.81(2)                      | 3.127(1) | 0.45(2)         | 0.208(1) | 7                        |

**Table S10.** Comparison of bond lengths of the Fe(III) coordination octahedron of crystal structure **1** at 150 K and optimized structural fragments **A**, **B** pairs in the LS ( $S=1/2$ ) state, as well as the isolated  $[\text{Fe}^{\text{III}}(\text{Hthpy})(\text{thpy})]$  molecule (TPSSh/6-311+G(d,p)).

| Structure           | Form ligand        | Fe-S, Å   | $\Delta(\text{exp-calc})$ , Å | Fe-N <sub>im</sub> , Å | $\Delta(\text{exp-calc})$ , Å | Fe-O, Å   | $\Delta(\text{exp-calc})$ , Å |
|---------------------|--------------------|-----------|-------------------------------|------------------------|-------------------------------|-----------|-------------------------------|
| X-ray (150K)        | Hthpy <sup>-</sup> | 2.2354(4) | -                             | 1.915(1)               | -                             | 1.9611(9) | -                             |
|                     | thpy <sup>2-</sup> | 2.2261(3) |                               | 1.909(1)               |                               | 1.9319(8) |                               |
| Pair <b>A</b>       | Hthpy <sup>-</sup> | 2.3190    | -0.0836(4)                    | 1.920                  | -0.005(1)                     | 1.9028    | 0.0583(9)                     |
|                     | thpy <sup>2-</sup> | 2.2471    | -0.021(3)                     | 1.910                  | -0.001(1)                     | 1.9282    | 0.0037(8)                     |
| Pair <b>B</b> (AFM) | Hthpy <sup>-</sup> | 2.3332    | -0.0978(4)                    | 1.911                  | 0.004(1)                      | 1.9285    | 0.0326(9)                     |
|                     | thpy <sup>2-</sup> | 2.2487    | -0.022(3)                     | 1.909                  | 0                             | 1.8913    | 0.0406(8)                     |
| Isolated complex    | Hthpy <sup>-</sup> | 2.3461    | -0.1107(4)                    | 1.912                  | 0.003(1)                      | 1.9045    | 0.0566(9)                     |
|                     | thpy <sup>2-</sup> | 2.2650    | -0.0389(3)                    | 1.909                  | 0                             | 1.8883    | 0.0436(8)                     |

**Table S11.** Comparison of bond lengths of the Fe(III) coordination octahedron in the HS ( $S=5/2$ ) and LS ( $S=1/2$ ) states for optimized structural fragments **A**, **B** pairs, and the isolated  $[\text{Fe}^{\text{III}}(\text{Hthpy})(\text{thpy})]$  molecule (TPSSh/6-311+G(d,p)). The relative change in bond lengths  $\Delta l$  is given in % relative to the LS state.

| Structure        | Form ligand        | Fe-S, Å |        | $\Delta l$ , % | Fe-N <sub>im</sub> , Å |       | $\Delta l$ , % | Fe-O, Å |        | $\Delta l$ , % |
|------------------|--------------------|---------|--------|----------------|------------------------|-------|----------------|---------|--------|----------------|
|                  |                    | LS      | HS     |                | LS                     | HS    |                | LS      | HS     |                |
| Pair <b>A</b>    | Hthpy <sup>-</sup> | 2.3190  | 2.5030 | 7.9            | 1.920                  | 2.209 | 15.1           | 1.9028  | 1.9610 | 3.1            |
|                  | thpy <sup>2-</sup> | 2.2471  | 2.3967 | 6.7            | 1.910                  | 2.172 | 13.7           | 1.9282  | 2.0206 | 4.8            |
| Pair <b>B</b>    | Hthpy <sup>-</sup> | 2.3332* | 2.5728 | 10.3           | 1.911*                 | 2.240 | 17.2           | 1.9285* | 2.0069 | 4.1            |
|                  | thpy <sup>2-</sup> | 2.2487* | 2.3701 | 5.4            | 1.909*                 | 2.139 | 12.0           | 1.8913* | 1.9589 | 3.6            |
| Isolated complex | Hthpy <sup>-</sup> | 2.3461  | 2.5712 | 9.6            | 1.912                  | 2.233 | 16.8           | 1.9045  | 1.9660 | 3.2            |
|                  | thpy <sup>2-</sup> | 2.2650  | 2.3975 | 5.8            | 1.909                  | 2.141 | 12.2           | 1.8883  | 1.9650 | 4.1            |

Rem: \* – The bond lengths for pair **B** in the LS state are given, taking into account the AFM state.

**Table S12.** Comparison of the Fe $\cdots$ Fe distance in the HS (S=5/2) and LS (S=1/2) states for the crystal structure **1** at 150 K and optimized structural fragments **A**, **B** pairs, as well as the isolated [Fe<sup>III</sup>(Hthpy)(thpy)] molecule (TPSSh/6-311+G(d,p)). The relative change in bond lengths  $\Delta^l$  is given in % relative to the LS state.

| Structure     | Fe $\cdots$ Fe, Å |              |                                          |        | $\Delta^l$ , % |
|---------------|-------------------|--------------|------------------------------------------|--------|----------------|
|               | LS                | X-ray (150K) | $\Delta[\text{exp-LS}(\text{calc})]$ , Å | HS     |                |
| Pair <b>A</b> | 6.1082            | 6.1534(4)    | 0.0452(4)                                | 6.9457 | 13.7           |
| Pair <b>B</b> | 7.2158*           | 7.0599(4)    | 0.1559(4)                                | 7.4772 | 3.6            |

Rem: \* – The bond lengths for Pair **B** in the LS state are given, taking into account the AFM state.

**Table S13.** Electronic energy ( $E_{el}$ ), zero-point vibration ( $E_{ZPV}$ ) energy, total energy ( $E_0 = E_{el} + E_{ZPV}$ ), and total spin angular momentum ( $\langle S^2 \rangle$ ) of the optimized molecular geometry, X-ray geometry with optimized hydrogen atoms, and X-ray geometry calculated and experimental values of exchange coupling constant  $J$  for two [Fe<sup>III</sup>(Hthpy)(thpy)] complexes in TS (S=S<sub>1</sub>+S<sub>2</sub>=1) and BS (S=S<sub>1</sub>+S<sub>2</sub>=0) states (Pair **B**). The  $J(\text{calc})$  values were calculated with formulas (eq. 2 and 3, see in text).  $J(\text{exp}) = -0.498(1)$  K.

| State                                                | Parameter       |                  |              |                       | $J(\text{calc})$ , K |           |
|------------------------------------------------------|-----------------|------------------|--------------|-----------------------|----------------------|-----------|
|                                                      | $E_{el}$ , a.u. | $E_{ZPV}$ , a.u. | $E_0$ , a.u. | $\langle S^2 \rangle$ | Noodleman            | Yamaguchi |
| Optimized structure                                  |                 |                  |              |                       |                      |           |
| TS                                                   | -6003.030426    | 0.436815         | -6002.593611 | 2.033278              | -84.17               | -84.18    |
| BS                                                   | -6003.030414    | 0.436536         | -6002.593878 | 1.033329              |                      |           |
| X-ray geometry at 150K with optimized hydrogen atoms |                 |                  |              |                       |                      |           |
| TS                                                   | -6002.938004    | —                | —            | 2.028684              | -13.82               | —         |
| BS                                                   | -6002.938048    |                  |              | 1.028534              |                      |           |
| X-ray geometry at 150K (SP calculations)             |                 |                  |              |                       |                      |           |
| TS                                                   | -6002.290379    | —                | —            | 2.028698              | -0.92                | —         |
| BS                                                   | -6002.290382    |                  |              | 1.028571              |                      |           |

**Table S14.** Optimized coordinates (TPSSh/6-311G+(d,p)) of [Fe<sup>III</sup>(Hthpy)(thpy)] in the sextet (HS) state. Units are in Å.

|    |                 |                 |                 |
|----|-----------------|-----------------|-----------------|
| C  | -3.070257000000 | 0.425665000000  | -1.292432000000 |
| C  | -2.057920000000 | -0.629639000000 | 1.798312000000  |
| C  | -0.679823000000 | -0.961553000000 | 2.314608000000  |
| C  | 1.330587000000  | 2.531976000000  | 0.351877000000  |
| C  | 2.479983000000  | 1.527445000000  | 0.254752000000  |
| C  | 2.446299000000  | -1.825589000000 | -0.834651000000 |
| C  | -3.278818000000 | -0.843081000000 | 2.623786000000  |
| H  | -3.787792000000 | 0.111813000000  | 2.792357000000  |
| H  | -2.996450000000 | -1.287802000000 | 3.577677000000  |
| H  | -3.985413000000 | -1.490076000000 | 2.094713000000  |
| C  | 3.854524000000  | 1.886428000000  | 0.709557000000  |
| H  | 4.060759000000  | 1.435505000000  | 1.688764000000  |
| H  | 3.907811000000  | 2.969653000000  | 0.821200000000  |
| H  | 4.618622000000  | 1.550936000000  | -0.000627000000 |
| N  | -3.227141000000 | 0.156939000000  | -0.009381000000 |
| N  | -2.054776000000 | -0.172506000000 | 0.584321000000  |
| N  | 2.094289000000  | 0.395247000000  | -0.212858000000 |
| N  | 2.940365000000  | -0.665480000000 | -0.313853000000 |
| H  | 3.823098000000  | -0.644067000000 | 0.188273000000  |
| N  | -4.188363000000 | 0.746010000000  | -1.993075000000 |
| H  | -5.028008000000 | 0.942736000000  | -1.466825000000 |
| H  | -4.088333000000 | 1.155071000000  | -2.907848000000 |
| N  | 3.291349000000  | -2.874254000000 | -0.848491000000 |
| H  | 4.202259000000  | -2.849950000000 | -0.413144000000 |
| H  | 2.932018000000  | -3.767087000000 | -1.148497000000 |
| O  | 0.280366000000  | -0.695004000000 | 1.457918000000  |
| O  | 0.171974000000  | 2.029944000000  | 0.054814000000  |
| O  | -0.519065000000 | -1.440372000000 | 3.426372000000  |
| O  | 1.581780000000  | 3.678182000000  | 0.687293000000  |
| Fe | -0.120141000000 | 0.116006000000  | -0.286475000000 |
| S  | -1.567276000000 | 0.325620000000  | -2.186472000000 |
| S  | 0.892722000000  | -1.919152000000 | -1.487926000000 |

**Table S15.** Optimized coordinates (TPSSh/6-311G+(d,p)) of [Fe<sup>III</sup>(Hthpy)(thpy)] in the doublet (LS) state. Units are in Å.



|    |                 |                 |                 |
|----|-----------------|-----------------|-----------------|
| C  | -2.291018000000 | -0.237450000000 | -1.931906000000 |
| C  | -2.278493000000 | 0.080880000000  | 1.485049000000  |
| C  | -1.110738000000 | 0.158743000000  | 2.428389000000  |
| C  | 1.082836000000  | 2.459157000000  | -0.271682000000 |
| C  | 2.258554000000  | 1.490317000000  | -0.214330000000 |
| C  | 2.194429000000  | -2.030513000000 | 0.131131000000  |
| C  | -3.688386000000 | 0.176840000000  | 1.952664000000  |
| H  | -4.155581000000 | 1.085032000000  | 1.557119000000  |
| H  | -3.697632000000 | 0.206473000000  | 3.042526000000  |
| H  | -4.274273000000 | -0.672429000000 | 1.589068000000  |
| C  | 3.670512000000  | 1.965142000000  | -0.183213000000 |
| H  | 4.133935000000  | 1.761267000000  | 0.790688000000  |
| H  | 3.664472000000  | 3.044710000000  | -0.338819000000 |
| H  | 4.274660000000  | 1.492402000000  | -0.966638000000 |
| N  | -2.847488000000 | -0.132418000000 | -0.742634000000 |
| N  | -1.914329000000 | -0.066122000000 | 0.246768000000  |
| N  | 1.858176000000  | 0.263665000000  | -0.176691000000 |
| N  | 2.730984000000  | -0.791381000000 | -0.076833000000 |
| H  | 3.697565000000  | -0.589970000000 | 0.159454000000  |
| N  | -3.122196000000 | -0.348370000000 | -3.003204000000 |
| H  | -4.096895000000 | -0.129817000000 | -2.852274000000 |
| H  | -2.744121000000 | -0.178633000000 | -3.921613000000 |
| N  | 3.082004000000  | -3.032751000000 | 0.328476000000  |
| H  | 4.046012000000  | -2.945370000000 | 0.039941000000  |
| H  | 2.712751000000  | -3.968711000000 | 0.403910000000  |
| O  | 0.068584000000  | 0.078870000000  | 1.829151000000  |
| O  | -0.086783000000 | 1.884605000000  | -0.206670000000 |
| O  | -1.259337000000 | 0.270628000000  | 3.633543000000  |
| O  | 1.300774000000  | 3.655848000000  | -0.367289000000 |
| Fe | -0.029648000000 | -0.012920000000 | -0.054314000000 |
| S  | -0.561614000000 | -0.311199000000 | -2.235628000000 |
| S  | 0.529603000000  | -2.283533000000 | 0.135076000000  |

**Table S16.** Optimized coordinates (TPSSh/6-311G+(d,p)) of **A** pair of [Fe<sup>III</sup>(Hthpy)(thpy)] in HS-HS state. Units are in Å.

|    |                 |                 |                 |
|----|-----------------|-----------------|-----------------|
| C  | 0.257404000000  | 0.641283000000  | 6.429856000000  |
| C  | -1.563955000000 | 2.001126000000  | 3.868434000000  |
| C  | -1.414988000000 | 1.812566000000  | 2.397487000000  |
| C  | -1.100819000000 | -2.332509000000 | 2.624133000000  |
| C  | -0.025506000000 | -2.379937000000 | 1.547503000000  |
| C  | 2.816277000000  | -0.364516000000 | 1.107435000000  |
| C  | -2.612744000000 | 2.874066000000  | 4.468956000000  |
| H  | -3.296667000000 | 2.273262000000  | 5.078003000000  |
| H  | -3.169230000000 | 3.379645000000  | 3.680357000000  |
| H  | -2.154706000000 | 3.608698000000  | 5.138205000000  |
| C  | -0.105327000000 | -3.347305000000 | 0.417112000000  |
| H  | -0.360331000000 | -2.818578000000 | -0.508881000000 |
| H  | -0.884160000000 | -4.077741000000 | 0.633958000000  |
| H  | 0.853243000000  | -3.852425000000 | 0.259464000000  |
| N  | -0.722794000000 | 1.357112000000  | 5.888831000000  |
| N  | -0.694899000000 | 1.311214000000  | 4.546600000000  |
| N  | 0.885669000000  | -1.486339000000 | 1.729653000000  |
| N  | 1.905906000000  | -1.332600000000 | 0.851392000000  |
| H  | 1.917515000000  | -1.778783000000 | -0.096549000000 |
| N  | 0.317594000000  | 0.635083000000  | 7.779060000000  |
| H  | -0.426630000000 | 1.076588000000  | 8.299254000000  |
| H  | 0.962143000000  | 0.024246000000  | 8.252690000000  |
| N  | 3.767492000000  | -0.211028000000 | 0.178305000000  |
| H  | 3.722359000000  | -0.748301000000 | -0.685073000000 |
| H  | 4.429261000000  | 0.542747000000  | 0.272676000000  |
| O  | -0.432558000000 | 1.074531000000  | 2.009160000000  |
| O  | -0.889332000000 | -1.431330000000 | 3.541322000000  |
| O  | -2.217626000000 | 2.355186000000  | 1.601717000000  |
| O  | -2.053262000000 | -3.093288000000 | 2.558147000000  |
| Fe | 0.511852000000  | -0.068733000000 | 3.381675000000  |
| S  | 1.499022000000  | -0.225680000000 | 5.560002000000  |
| S  | 2.784688000000  | 0.560074000000  | 2.542722000000  |
| C  | -0.017972000000 | -0.367384000000 | -6.555616000000 |
| C  | 1.802708000000  | -1.727958000000 | -3.994099000000 |
| C  | 1.653650000000  | -1.539456000000 | -2.523152000000 |
| C  | 1.340629000000  | 2.605334000000  | -2.748977000000 |
| C  | 0.265069000000  | 2.652963000000  | -1.672604000000 |
| C  | -2.577464000000 | 0.638380000000  | -1.233522000000 |
| C  | 2.851391000000  | -2.601052000000 | -4.594582000000 |
| H  | 3.535471000000  | -2.000337000000 | -5.203540000000 |
| H  | 3.407722000000  | -3.106775000000 | -3.805967000000 |
| H  | 2.393276000000  | -3.335564000000 | -5.263910000000 |
| C  | 0.344990000000  | 3.620073000000  | -0.542000000000 |
| H  | 0.599749000000  | 3.091078000000  | 0.383908000000  |

|    |                 |                 |                 |
|----|-----------------|-----------------|-----------------|
| H  | 1.124040000000  | 4.350354000000  | -0.758586000000 |
| H  | -0.613471000000 | 4.125404000000  | -0.384368000000 |
| N  | 0.961927000000  | -1.083575000000 | -6.014533000000 |
| N  | 0.933876000000  | -1.037798000000 | -4.672300000000 |
| N  | -0.646371000000 | 1.759711000000  | -1.855127000000 |
| N  | -1.666846000000 | 1.606135000000  | -0.977116000000 |
| H  | -1.678513000000 | 2.052121000000  | -0.029092000000 |
| N  | -0.078000000000 | -0.361049000000 | -7.904826000000 |
| H  | 0.666135000000  | -0.802763000000 | -8.424971000000 |
| H  | -0.722296000000 | 0.250035000000  | -8.378482000000 |
| N  | -3.528907000000 | 0.485017000000  | -0.304604000000 |
| H  | -3.483758000000 | 1.022106000000  | 0.558892000000  |
| H  | -4.190946000000 | -0.268478000000 | -0.399295000000 |
| O  | 0.671236000000  | -0.801385000000 | -2.134859000000 |
| O  | 1.128972000000  | 1.704497000000  | -3.666460000000 |
| O  | 2.456246000000  | -2.082112000000 | -1.727363000000 |
| O  | 2.293415000000  | 3.365647000000  | -2.682531000000 |
| Fe | -0.272683000000 | 0.342306000000  | -3.507356000000 |
| S  | -1.259401000000 | 0.499928000000  | -5.685839000000 |
| S  | -2.545872000000 | -0.285949000000 | -2.668974000000 |

**Table S17.** Optimized coordinates (TPSSh/6-311G+(d,p)) of **A** pair of [Fe<sup>III</sup>(Hthpy)(thpy)] in LS-LS (TS) state. Units are in Å.

|    |                 |                 |                 |
|----|-----------------|-----------------|-----------------|
| C  | 0.351265000000  | 0.317725000000  | 5.877499000000  |
| C  | -1.510606000000 | 2.011510000000  | 3.542348000000  |
| C  | -1.588078000000 | 1.774971000000  | 2.081074000000  |
| C  | -1.335734000000 | -2.294106000000 | 2.400363000000  |
| C  | -0.069419000000 | -2.449024000000 | 1.578116000000  |
| C  | 2.555613000000  | -0.140635000000 | 1.187302000000  |
| C  | -2.335650000000 | 3.025849000000  | 4.256153000000  |
| H  | -2.994525000000 | 2.536954000000  | 4.981292000000  |
| H  | -2.934246000000 | 3.578127000000  | 3.531495000000  |
| H  | -1.697134000000 | 3.715758000000  | 4.816353000000  |
| C  | 0.121557000000  | -3.596474000000 | 0.648845000000  |
| H  | -0.119966000000 | -3.297271000000 | -0.377357000000 |
| H  | -0.565880000000 | -4.391228000000 | 0.940667000000  |
| H  | 1.152005000000  | -3.963257000000 | 0.663062000000  |
| N  | -0.475648000000 | 1.265871000000  | 5.456003000000  |
| N  | -0.653285000000 | 1.209596000000  | 4.117614000000  |
| N  | 0.740265000000  | -1.457824000000 | 1.761859000000  |
| N  | 1.909433000000  | -1.327878000000 | 1.067657000000  |
| H  | 2.064242000000  | -1.856082000000 | 0.176728000000  |
| N  | 0.626085000000  | 0.292513000000  | 7.201421000000  |
| H  | 0.093210000000  | 0.891492000000  | 7.814590000000  |
| H  | 1.120299000000  | -0.491439000000 | 7.594896000000  |
| N  | 3.614046000000  | 0.025595000000  | 0.383257000000  |
| H  | 3.732482000000  | -0.613996000000 | -0.399790000000 |
| H  | 4.030684000000  | 0.942378000000  | 0.321214000000  |
| O  | -0.794992000000 | 0.864650000000  | 1.607792000000  |
| O  | -1.367458000000 | -1.219515000000 | 3.150186000000  |
| O  | -2.371554000000 | 2.419855000000  | 1.343920000000  |
| O  | -2.233508000000 | -3.116294000000 | 2.304186000000  |
| Fe | 0.158098000000  | -0.094748000000 | 2.982309000000  |
| S  | 1.132636000000  | -0.868961000000 | 4.853241000000  |
| S  | 2.069690000000  | 1.040488000000  | 2.323033000000  |
| C  | -0.112094000000 | -0.044328000000 | -6.003078000000 |
| C  | 1.749736000000  | -1.738153000000 | -3.667924000000 |
| C  | 1.827202000000  | -1.501623000000 | -2.206648000000 |
| C  | 1.574914000000  | 2.567448000000  | -2.525896000000 |
| C  | 0.308592000000  | 2.722379000000  | -1.703663000000 |
| C  | -2.316476000000 | 0.414021000000  | -1.312898000000 |
| C  | 2.574774000000  | -2.752498000000 | -4.381729000000 |
| H  | 3.233663000000  | -2.263606000000 | -5.106857000000 |
| H  | 3.173355000000  | -3.304790000000 | -3.657070000000 |
| H  | 1.936254000000  | -3.442393000000 | -4.941942000000 |
| C  | 0.117622000000  | 3.869820000000  | -0.774381000000 |
| H  | 0.359123000000  | 3.570600000000  | 0.251822000000  |
| H  | 0.805079000000  | 4.664565000000  | -1.066182000000 |

|    |                 |                 |                 |
|----|-----------------|-----------------|-----------------|
| H  | -0.912818000000 | 4.236623000000  | -0.788610000000 |
| N  | 0.714802000000  | -0.992489000000 | -5.581582000000 |
| N  | 0.892430000000  | -0.936225000000 | -4.243192000000 |
| N  | -0.501105000000 | 1.731192000000  | -1.887426000000 |
| N  | -1.670281000000 | 1.601255000000  | -1.193237000000 |
| H  | -1.825094000000 | 2.129453000000  | -0.302306000000 |
| N  | -0.386903000000 | -0.019103000000 | -7.327003000000 |
| H  | 0.145967000000  | -0.618087000000 | -7.940171000000 |
| H  | -0.881103000000 | 0.764858000000  | -7.720476000000 |
| N  | -3.374917000000 | 0.247799000000  | -0.508862000000 |
| H  | -3.493342000000 | 0.887383000000  | 0.274194000000  |
| H  | -3.791571000000 | -0.668977000000 | -0.446834000000 |
| O  | 1.034118000000  | -0.591299000000 | -1.733366000000 |
| O  | 1.606628000000  | 1.492869000000  | -3.275735000000 |
| O  | 2.610669000000  | -2.146515000000 | -1.469493000000 |
| O  | 2.472704000000  | 3.389617000000  | -2.429693000000 |
| Fe | 0.081054000000  | 0.368121000000  | -3.107884000000 |
| S  | -0.893454000000 | 1.142363000000  | -4.978819000000 |
| S  | -1.830560000000 | -0.767097000000 | -2.448637000000 |

**Table S18.** Optimized coordinates (TPSSh/6-311G+(d,p)) of **B** pair of [Fe<sup>III</sup>(Hthpy)(thpy)] in HS-HS state. Units are in Å.

|   |                |                |                |
|---|----------------|----------------|----------------|
| C | 0.218044000000 | 6.240470000000 | 5.988290000000 |
|---|----------------|----------------|----------------|

|    |                 |                |                 |
|----|-----------------|----------------|-----------------|
| C  | -1.236881000000 | 7.426440000000 | 3.124835000000  |
| C  | -1.002265000000 | 7.053984000000 | 1.686308000000  |
| C  | -0.881462000000 | 2.687266000000 | 2.434446000000  |
| C  | 0.150690000000  | 2.713349000000 | 1.313201000000  |
| C  | 2.923101000000  | 4.833785000000 | 0.812854000000  |
| C  | -2.134125000000 | 8.548998000000 | 3.517252000000  |
| H  | -2.899325000000 | 8.195777000000 | 4.215924000000  |
| H  | -2.596406000000 | 8.972607000000 | 2.625885000000  |
| H  | -1.562472000000 | 9.319507000000 | 4.045697000000  |
| C  | 0.036238000000  | 1.786875000000 | 0.148892000000  |
| H  | -0.326804000000 | 2.327079000000 | -0.734961000000 |
| H  | -0.691923000000 | 1.013516000000 | 0.393570000000  |
| H  | 0.998288000000  | 1.321469000000 | -0.093786000000 |
| N  | -0.671458000000 | 6.929958000000 | 5.287838000000  |
| N  | -0.563526000000 | 6.696734000000 | 3.964231000000  |
| N  | 1.044583000000  | 3.618976000000 | 1.489213000000  |
| N  | 2.006644000000  | 3.854046000000 | 0.558130000000  |
| H  | 1.905208000000  | 3.452624000000 | -0.369444000000 |
| N  | 0.209436000000  | 6.369402000000 | 7.323781000000  |
| H  | -0.583330000000 | 6.802866000000 | 7.797577000000  |
| H  | 0.816361000000  | 5.779546000000 | 7.869398000000  |
| N  | 3.813032000000  | 5.074818000000 | -0.169624000000 |
| H  | 3.757564000000  | 4.639843000000 | -1.079316000000 |
| H  | 4.451177000000  | 5.846049000000 | -0.049970000000 |
| O  | -0.165802000000 | 6.047845000000 | 1.530799000000  |
| O  | -0.730886000000 | 3.628205000000 | 3.317877000000  |
| O  | -1.550220000000 | 7.653729000000 | 0.773892000000  |
| O  | -1.747346000000 | 1.825498000000 | 2.420284000000  |
| Fe | 0.587584000000  | 5.123127000000 | 3.084635000000  |
| S  | 1.467329000000  | 5.211289000000 | 5.283648000000  |
| S  | 2.979426000000  | 5.641474000000 | 2.291247000000  |
| C  | -3.055929000000 | 4.214127000000 | 6.486590000000  |
| C  | -1.601005000000 | 3.028156000000 | 9.350046000000  |
| C  | -1.835622000000 | 3.400613000000 | 10.788572000000 |
| C  | -1.956422000000 | 7.767331000000 | 10.040432000000 |
| C  | -2.988575000000 | 7.741250000000 | 11.161677000000 |
| C  | -5.760989000000 | 5.620819000000 | 11.662026000000 |
| C  | -0.703761000000 | 1.905598000000 | 8.957629000000  |
| H  | 0.061439000000  | 2.258819000000 | 8.258958000000  |
| H  | -0.241481000000 | 1.481989000000 | 9.848996000000  |
| H  | -1.275415000000 | 1.135089000000 | 8.429184000000  |
| C  | -2.874125000000 | 8.667728000000 | 12.325983000000 |
| H  | -2.511084000000 | 8.127527000000 | 13.209839000000 |
| H  | -2.145964000000 | 9.441086000000 | 12.081304000000 |
| H  | -3.836176000000 | 9.133135000000 | 12.568658000000 |

|    |                 |                |                 |
|----|-----------------|----------------|-----------------|
| N  | -2.166427000000 | 3.524638000000 | 7.187042000000  |
| N  | -2.274360000000 | 3.757863000000 | 8.510649000000  |
| N  | -3.882469000000 | 6.835624000000 | 10.985666000000 |
| N  | -4.844531000000 | 6.600558000000 | 11.916748000000 |
| H  | -4.743098000000 | 7.001983000000 | 12.844321000000 |
| N  | -3.047320000000 | 4.085194000000 | 5.151099000000  |
| H  | -2.254554000000 | 3.651730000000 | 4.677304000000  |
| H  | -3.654244000000 | 4.675050000000 | 4.605481000000  |
| N  | -6.650924000000 | 5.379792000000 | 12.644502000000 |
| H  | -6.595459000000 | 5.814772000000 | 13.554193000000 |
| H  | -7.289070000000 | 4.608561000000 | 12.524850000000 |
| O  | -2.672085000000 | 4.406752000000 | 10.944081000000 |
| O  | -2.106998000000 | 6.826391000000 | 9.157002000000  |
| O  | -1.287667000000 | 2.800868000000 | 11.700989000000 |
| O  | -1.090538000000 | 8.629098000000 | 10.054593000000 |
| Fe | -3.425469000000 | 5.331470000000 | 9.390244000000  |
| S  | -4.305214000000 | 5.243308000000 | 7.191231000000  |
| S  | -5.817313000000 | 4.813126000000 | 10.183635000000 |

**Table S19.** Optimized coordinates (TPSSh/6-311G+(d,p)) of **B** pair of [Fe<sup>III</sup>(Hthpy)(thpy)] in LS-LS (TS) state. Units are in Å.

|   |                 |                |                |
|---|-----------------|----------------|----------------|
| C | 0.381407000000  | 5.800300000000 | 5.904103000000 |
| C | -1.411392000000 | 7.377410000000 | 3.430060000000 |

|    |                 |                |                 |
|----|-----------------|----------------|-----------------|
| C  | -1.496536000000 | 7.062543000000 | 1.967554000000  |
| C  | -1.274203000000 | 2.921303000000 | 2.587730000000  |
| C  | -0.047141000000 | 2.796465000000 | 1.701716000000  |
| C  | 2.593142000000  | 5.101493000000 | 1.229696000000  |
| C  | -2.175802000000 | 8.489787000000 | 4.059956000000  |
| H  | -2.697018000000 | 8.140140000000 | 4.956083000000  |
| H  | -2.879713000000 | 8.893850000000 | 3.331476000000  |
| H  | -1.494265000000 | 9.284944000000 | 4.382841000000  |
| C  | 0.135489000000  | 1.647156000000 | 0.770514000000  |
| H  | 0.095297000000  | 1.974486000000 | -0.276414000000 |
| H  | -0.680404000000 | 0.943725000000 | 0.940456000000  |
| H  | 1.089923000000  | 1.135569000000 | 0.942896000000  |
| N  | -0.443098000000 | 6.711453000000 | 5.412538000000  |
| N  | -0.609171000000 | 6.578857000000 | 4.075021000000  |
| N  | 0.756752000000  | 3.795831000000 | 1.857165000000  |
| N  | 1.912899000000  | 3.920004000000 | 1.129144000000  |
| H  | 2.044987000000  | 3.303291000000 | 0.333536000000  |
| N  | 0.622220000000  | 5.806544000000 | 7.226613000000  |
| H  | -0.025986000000 | 6.291632000000 | 7.850029000000  |
| H  | 1.146889000000  | 5.040877000000 | 7.618936000000  |
| N  | 3.670907000000  | 5.232257000000 | 0.419865000000  |
| H  | 4.131237000000  | 4.421110000000 | 0.031528000000  |
| H  | 4.240298000000  | 6.056213000000 | 0.544278000000  |
| O  | -0.731609000000 | 6.045893000000 | 1.591542000000  |
| O  | -1.309638000000 | 4.017333000000 | 3.300896000000  |
| O  | -2.209722000000 | 7.696465000000 | 1.205662000000  |
| O  | -2.119185000000 | 2.040843000000 | 2.581367000000  |
| Fe | 0.184439000000  | 5.203117000000 | 3.015972000000  |
| S  | 1.219870000000  | 4.593591000000 | 4.916902000000  |
| S  | 2.109157000000  | 6.308608000000 | 2.296972000000  |
| C  | -3.219292000000 | 4.654300000000 | 6.570776000000  |
| C  | -1.426495000000 | 3.077190000000 | 9.044820000000  |
| C  | -1.341351000000 | 3.392056000000 | 10.507325000000 |
| C  | -1.563683000000 | 7.533297000000 | 9.887149000000  |
| C  | -2.790745000000 | 7.658135000000 | 10.773162000000 |
| C  | -5.431029000000 | 5.353108000000 | 11.245182000000 |
| C  | -0.662085000000 | 1.964813000000 | 8.414923000000  |
| H  | -0.140867000000 | 2.314459000000 | 7.518798000000  |
| H  | 0.041825000000  | 1.560748000000 | 9.143404000000  |
| H  | -1.343622000000 | 1.169656000000 | 8.092037000000  |
| C  | -2.973374000000 | 8.807444000000 | 11.704365000000 |
| H  | -2.933183000000 | 8.480114000000 | 12.751293000000 |
| H  | -2.157482000000 | 9.510875000000 | 11.534423000000 |
| H  | -3.927809000000 | 9.319031000000 | 11.531983000000 |
| N  | -2.394788000000 | 3.743146000000 | 7.062341000000  |
| N  | -2.228716000000 | 3.875743000000 | 8.399859000000  |
| N  | -3.594638000000 | 6.658770000000 | 10.617714000000 |
| N  | -4.750785000000 | 6.534597000000 | 11.345734000000 |
| H  | -4.882874000000 | 7.151310000000 | 12.141342000000 |
| N  | -3.460106000000 | 4.648056000000 | 5.248266000000  |
| H  | -2.811900000000 | 4.162968000000 | 4.624850000000  |
| H  | -3.984775000000 | 5.413723000000 | 4.855942000000  |



|    |                 |                |                 |
|----|-----------------|----------------|-----------------|
| N  | -6.508794000000 | 5.222344000000 | 12.055013000000 |
| H  | -6.969123000000 | 6.033491000000 | 12.443351000000 |
| H  | -7.078186000000 | 4.398389000000 | 11.930600000000 |
| O  | -2.106278000000 | 4.408707000000 | 10.883337000000 |
| O  | -1.528248000000 | 6.437267000000 | 9.173983000000  |
| O  | -0.628166000000 | 2.758134000000 | 11.269218000000 |
| O  | -0.718701000000 | 8.413756000000 | 9.893512000000  |
| Fe | -3.022325000000 | 5.251483000000 | 9.458907000000  |
| S  | -4.057755000000 | 5.861009000000 | 7.557977000000  |
| S  | -4.947044000000 | 4.145993000000 | 10.177907000000 |

**Table S20.** Optimized coordinates (TPSSh/6-311G+(d,p)) of **B** pair of [Fe<sup>III</sup>(Hthpy)(thpy)] in BS ( $S_1+S_2=0$ ) state. Units are in Å.

|   |                |                |                 |
|---|----------------|----------------|-----------------|
| C | 1.051542000000 | 0.615828000000 | 1.467773000000  |
| C | 2.375622000000 | 2.366789000000 | -1.178669000000 |
| C | 3.672712000000 | 2.164241000000 | -1.900983000000 |

|    |                 |                 |                 |
|----|-----------------|-----------------|-----------------|
| C  | 1.398884000000  | 3.423819000000  | -1.562478000000 |
| H  | 0.391456000000  | 3.006029000000  | -1.648296000000 |
| H  | 1.716027000000  | 3.874375000000  | -2.503689000000 |
| H  | 1.353242000000  | 4.198827000000  | -0.788941000000 |
| N  | 1.067478000000  | 1.556808000000  | 0.537147000000  |
| N  | 2.204438000000  | 1.526450000000  | -0.197950000000 |
| N  | -0.030475000000 | 0.520706000000  | 2.259327000000  |
| H  | -0.907541000000 | 0.953488000000  | 1.963472000000  |
| H  | -0.098654000000 | -0.269926000000 | 2.880331000000  |
| O  | 4.416678000000  | 1.184475000000  | -1.404461000000 |
| O  | 3.999239000000  | 2.849835000000  | -2.857158000000 |
| S  | 2.390827000000  | -0.504542000000 | 1.760179000000  |
| Fe | 3.599777000000  | 0.241381000000  | 0.016942000000  |
| C  | 3.509863000000  | -2.007579000000 | -1.548243000000 |
| C  | 4.850171000000  | -2.056598000000 | -0.835599000000 |
| C  | 6.260074000000  | 0.288697000000  | 1.404775000000  |
| C  | 5.847793000000  | -3.128710000000 | -1.112304000000 |
| H  | 6.744671000000  | -2.720709000000 | -1.595966000000 |
| H  | 5.389385000000  | -3.847385000000 | -1.792569000000 |
| H  | 6.148278000000  | -3.647640000000 | -0.194233000000 |
| N  | 4.989882000000  | -1.069282000000 | -0.014214000000 |
| N  | 6.138181000000  | -0.884213000000 | 0.713265000000  |
| H  | 6.953183000000  | -1.438303000000 | 0.469254000000  |
| N  | 7.446344000000  | 0.485445000000  | 2.028153000000  |
| H  | 8.052995000000  | -0.291537000000 | 2.249318000000  |
| H  | 7.523614000000  | 1.299347000000  | 2.619899000000  |
| O  | 2.775282000000  | -0.971232000000 | -1.235655000000 |
| O  | 3.209309000000  | -2.889653000000 | -2.336101000000 |
| S  | 5.006282000000  | 1.408495000000  | 1.467189000000  |
| C  | -3.509851000000 | 2.007574000000  | 1.548250000000  |
| C  | -4.850156000000 | 2.056604000000  | 0.835602000000  |
| C  | -6.260071000000 | -0.288674000000 | -1.404783000000 |
| C  | -5.847771000000 | 3.128723000000  | 1.112306000000  |
| H  | -6.744654000000 | 2.720729000000  | 1.595965000000  |
| H  | -5.389360000000 | 3.847395000000  | 1.792572000000  |
| H  | -6.148251000000 | 3.647657000000  | 0.194234000000  |
| N  | -4.989872000000 | 1.069291000000  | 0.014214000000  |
| N  | -6.138170000000 | 0.884234000000  | -0.713270000000 |
| H  | -6.953168000000 | 1.438330000000  | -0.469261000000 |
| N  | -7.446340000000 | -0.485411000000 | -2.028165000000 |
| H  | -8.052985000000 | 0.291576000000  | -2.249330000000 |
| H  | -7.523614000000 | -1.299312000000 | -2.619913000000 |
| O  | -2.775277000000 | 0.971222000000  | 1.235661000000  |
| O  | -3.209294000000 | 2.889643000000  | 2.336112000000  |
| S  | -5.006288000000 | -1.408483000000 | -1.467194000000 |
| Fe | -3.599777000000 | -0.241381000000 | -0.016941000000 |
| C  | -1.051542000000 | -0.615844000000 | -1.467770000000 |
| C  | -2.375639000000 | -2.366800000000 | 1.178668000000  |
| C  | -3.672728000000 | -2.164245000000 | 1.900979000000  |
| C  | -1.398908000000 | -3.423838000000 | 1.562476000000  |
| H  | -0.391477000000 | -3.006055000000 | 1.648294000000  |
| H  | -1.716055000000 | -3.874391000000 | 2.503687000000  |

|   |                 |                 |                 |
|---|-----------------|-----------------|-----------------|
| H | -1.353273000000 | -4.198846000000 | 0.788939000000  |
| N | -1.067486000000 | -1.556825000000 | -0.537145000000 |
| N | -2.204447000000 | -1.526460000000 | 0.197950000000  |
| N | 0.030476000000  | -0.520726000000 | -2.259322000000 |
| H | 0.907540000000  | -0.953513000000 | -1.963466000000 |
| H | 0.098662000000  | 0.269908000000  | -2.880322000000 |
| O | -4.416687000000 | -1.184474000000 | 1.404457000000  |
| O | -3.999261000000 | -2.849839000000 | 2.857153000000  |
| S | -2.390819000000 | 0.504537000000  | -1.760174000000 |

**Table S21.** H-Optimized coordinates (TPSSh/6-311G+(d,p)) of **B** pair of [Fe<sup>III</sup>(Hthpy)(thpy)] in LS-LS (TS) state. Units are in Å.

|   |                 |                |                 |
|---|-----------------|----------------|-----------------|
| C | 1.737160000000  | 0.252227000000 | -0.268341000000 |
| C | -0.006582000000 | 1.995156000000 | -2.676734000000 |
| C | -0.144859000000 | 1.677127000000 | -4.132553000000 |

|    |                 |                 |                 |
|----|-----------------|-----------------|-----------------|
| C  | 0.170002000000  | -2.501472000000 | -3.755813000000 |
| C  | 1.388308000000  | -2.532211000000 | -4.641774000000 |
| C  | 3.958453000000  | -0.150117000000 | -4.869909000000 |
| C  | -0.713834000000 | 3.138471000000  | -2.042886000000 |
| H  | -1.090993000000 | 2.863636000000  | -1.054250000000 |
| H  | -1.516333000000 | 3.464831000000  | -2.706007000000 |
| H  | -0.022785000000 | 3.977617000000  | -1.897346000000 |
| C  | 1.605446000000  | -3.647505000000 | -5.592364000000 |
| H  | 1.495484000000  | -3.312288000000 | -6.631797000000 |
| H  | 0.842982000000  | -4.401839000000 | -5.393163000000 |
| H  | 2.597487000000  | -4.100227000000 | -5.474089000000 |
| N  | 1.004803000000  | 1.270240000000  | -0.722671000000 |
| N  | 0.776342000000  | 1.153772000000  | -2.067715000000 |
| N  | 2.153546000000  | -1.518912000000 | -4.421439000000 |
| N  | 3.324273000000  | -1.323917000000 | -5.101790000000 |
| H  | 3.531670000000  | -1.913091000000 | -5.901731000000 |
| N  | 1.986143000000  | 0.186365000000  | 1.037872000000  |
| H  | 1.487383000000  | 0.802550000000  | 1.680156000000  |
| H  | 2.498818000000  | -0.593828000000 | 1.413856000000  |
| N  | 5.039069000000  | 0.108516000000  | -5.565413000000 |
| H  | 5.455797000000  | -0.546363000000 | -6.210684000000 |
| H  | 5.530705000000  | 0.973400000000  | -5.397750000000 |
| O  | 0.550018000000  | 0.685087000000  | -4.569926000000 |
| O  | 0.022767000000  | -1.442071000000 | -3.036306000000 |
| O  | -0.897391000000 | 2.346849000000  | -4.858466000000 |
| O  | -0.595820000000 | -3.471241000000 | -3.732110000000 |
| Fe | 1.539285000000  | -0.205967000000 | -3.169990000000 |
| S  | 2.397714000000  | -1.014937000000 | -1.282040000000 |
| S  | 3.373693000000  | 0.959840000000  | -3.692443000000 |
| C  | -1.737160000000 | -0.252227000000 | 0.268341000000  |
| C  | 0.006582000000  | -1.995156000000 | 2.676734000000  |
| C  | 0.144859000000  | -1.677127000000 | 4.132553000000  |
| C  | -0.170002000000 | 2.501472000000  | 3.755813000000  |
| C  | -1.388308000000 | 2.532211000000  | 4.641774000000  |
| C  | -3.958453000000 | 0.150117000000  | 4.869909000000  |
| C  | 0.713834000000  | -3.138471000000 | 2.042886000000  |
| H  | 1.090993000000  | -2.863636000000 | 1.054250000000  |
| H  | 1.516333000000  | -3.464831000000 | 2.706007000000  |
| H  | 0.022785000000  | -3.977617000000 | 1.897346000000  |
| C  | -1.605446000000 | 3.647505000000  | 5.592364000000  |
| H  | -1.495484000000 | 3.312288000000  | 6.631797000000  |
| H  | -0.842982000000 | 4.401839000000  | 5.393163000000  |
| H  | -2.597487000000 | 4.100227000000  | 5.474089000000  |
| N  | -1.004803000000 | -1.270240000000 | 0.722671000000  |
| N  | -0.776342000000 | -1.153772000000 | 2.067715000000  |
| N  | -2.153546000000 | 1.518912000000  | 4.421439000000  |
| N  | -3.324273000000 | 1.323917000000  | 5.101790000000  |
| H  | -3.531670000000 | 1.913091000000  | 5.901731000000  |
| N  | -1.986143000000 | -0.186365000000 | -1.037872000000 |
| H  | -1.487383000000 | -0.802550000000 | -1.680156000000 |
| H  | -2.498818000000 | 0.593828000000  | -1.413856000000 |
| N  | -5.039069000000 | -0.108516000000 | 5.565413000000  |

|    |                 |                 |                |
|----|-----------------|-----------------|----------------|
| H  | -5.455797000000 | 0.546363000000  | 6.210684000000 |
| H  | -5.530705000000 | -0.973400000000 | 5.397750000000 |
| O  | -0.550018000000 | -0.685087000000 | 4.569926000000 |
| O  | -0.022767000000 | 1.442071000000  | 3.036306000000 |
| O  | 0.897391000000  | -2.346849000000 | 4.858466000000 |
| O  | 0.595820000000  | 3.471241000000  | 3.732110000000 |
| Fe | -1.539285000000 | 0.205967000000  | 3.169990000000 |
| S  | -2.397714000000 | 1.014937000000  | 1.282040000000 |
| S  | -3.373693000000 | -0.959840000000 | 3.692443000000 |

**Table S22.** H-Optimized coordinates (TPSSH/6-311G+(d,p)) of **B** pair of [Fe<sup>III</sup>(Hthpy)(thpy)] in BS ( $S_1+S_2=0$ ) state. Units are in Å.

|   |                 |                 |                 |
|---|-----------------|-----------------|-----------------|
| C | -0.957165000000 | -0.351855000000 | 1.453743000000  |
| C | -2.153895000000 | -2.282718000000 | -1.138215000000 |
| C | -3.435124000000 | -2.125733000000 | -1.895499000000 |

|    |                 |                 |                 |
|----|-----------------|-----------------|-----------------|
| C  | -1.145852000000 | -3.317224000000 | -1.488622000000 |
| H  | -0.131730000000 | -2.920176000000 | -1.395686000000 |
| H  | -1.349385000000 | -3.676826000000 | -2.498345000000 |
| H  | -1.219748000000 | -4.166631000000 | -0.798714000000 |
| N  | -0.927027000000 | -1.383775000000 | 0.609199000000  |
| N  | -2.046254000000 | -1.410697000000 | -0.179147000000 |
| N  | 0.096815000000  | -0.149083000000 | 2.241645000000  |
| H  | 0.959878000000  | -0.667458000000 | 2.076350000000  |
| H  | 0.117719000000  | 0.644309000000  | 2.860460000000  |
| O  | -4.243949000000 | -1.218716000000 | -1.469588000000 |
| O  | -3.680950000000 | -2.841776000000 | -2.879691000000 |
| S  | -2.299846000000 | 0.764648000000  | 1.596517000000  |
| Fe | -3.523290000000 | -0.216526000000 | 0.016561000000  |
| C  | -3.732881000000 | 2.052267000000  | -1.498723000000 |
| C  | -5.053362000000 | 1.932859000000  | -0.783045000000 |
| C  | -6.078275000000 | -0.562966000000 | 1.464720000000  |
| C  | -6.130669000000 | 2.923841000000  | -1.011109000000 |
| H  | -6.975889000000 | 2.477303000000  | -1.550635000000 |
| H  | -5.715854000000 | 3.723751000000  | -1.625982000000 |
| H  | -6.501651000000 | 3.349748000000  | -0.070860000000 |
| N  | -5.064229000000 | 0.920453000000  | 0.014363000000  |
| N  | -6.153315000000 | 0.602119000000  | 0.778619000000  |
| H  | -7.029278000000 | 1.086534000000  | 0.611142000000  |
| N  | -7.134528000000 | -0.942498000000 | 2.141965000000  |
| H  | -7.968127000000 | -0.380752000000 | 2.233912000000  |
| H  | -7.092107000000 | -1.801765000000 | 2.668948000000  |
| O  | -2.898945000000 | 1.087817000000  | -1.308130000000 |
| O  | -3.498177000000 | 3.049039000000  | -2.190727000000 |
| S  | -4.640476000000 | -1.507975000000 | 1.459185000000  |
| C  | 3.732881000000  | -2.052267000000 | 1.498724000000  |
| C  | 5.053362000000  | -1.932859000000 | 0.783045000000  |
| C  | 6.078275000000  | 0.562966000000  | -1.464721000000 |
| C  | 6.130669000000  | -2.923841000000 | 1.011109000000  |
| H  | 6.975889000000  | -2.477303000000 | 1.550634000000  |
| H  | 5.715855000000  | -3.723751000000 | 1.625983000000  |
| H  | 6.501650000000  | -3.349748000000 | 0.070860000000  |
| N  | 5.064228000000  | -0.920453000000 | -0.014362000000 |
| N  | 6.153315000000  | -0.602119000000 | -0.778619000000 |
| H  | 7.029278000000  | -1.086533000000 | -0.611141000000 |
| N  | 7.134528000000  | 0.942498000000  | -2.141965000000 |
| H  | 7.968127000000  | 0.380752000000  | -2.233911000000 |
| H  | 7.092107000000  | 1.801765000000  | -2.668947000000 |
| O  | 2.898946000000  | -1.087817000000 | 1.308130000000  |
| O  | 3.498177000000  | -3.049039000000 | 2.190728000000  |
| S  | 4.640476000000  | 1.507975000000  | -1.459185000000 |
| Fe | 3.523290000000  | 0.216526000000  | -0.016562000000 |
| C  | 0.957164000000  | 0.351855000000  | -1.453743000000 |
| C  | 2.153895000000  | 2.282718000000  | 1.138215000000  |
| C  | 3.435124000000  | 2.125733000000  | 1.895498000000  |
| C  | 1.145852000000  | 3.317224000000  | 1.488621000000  |
| H  | 0.131730000000  | 2.920177000000  | 1.395685000000  |
| H  | 1.349385000000  | 3.676825000000  | 2.498344000000  |

|   |                 |                 |                 |
|---|-----------------|-----------------|-----------------|
| H | 1.219749000000  | 4.166631000000  | 0.798714000000  |
| N | 0.927027000000  | 1.383775000000  | -0.609199000000 |
| N | 2.046254000000  | 1.410697000000  | 0.179147000000  |
| N | -0.096816000000 | 0.149083000000  | -2.241645000000 |
| H | -0.959879000000 | 0.667457000000  | -2.076350000000 |
| H | -0.117720000000 | -0.644310000000 | -2.860460000000 |
| O | 4.243949000000  | 1.218716000000  | 1.469587000000  |
| O | 3.680950000000  | 2.841776000000  | 2.879691000000  |
| S | 2.299846000000  | -0.764648000000 | -1.596516000000 |
